# Supplementary material
Source: PubMed Central journal article supplement (PMC4177506)

Figure S2

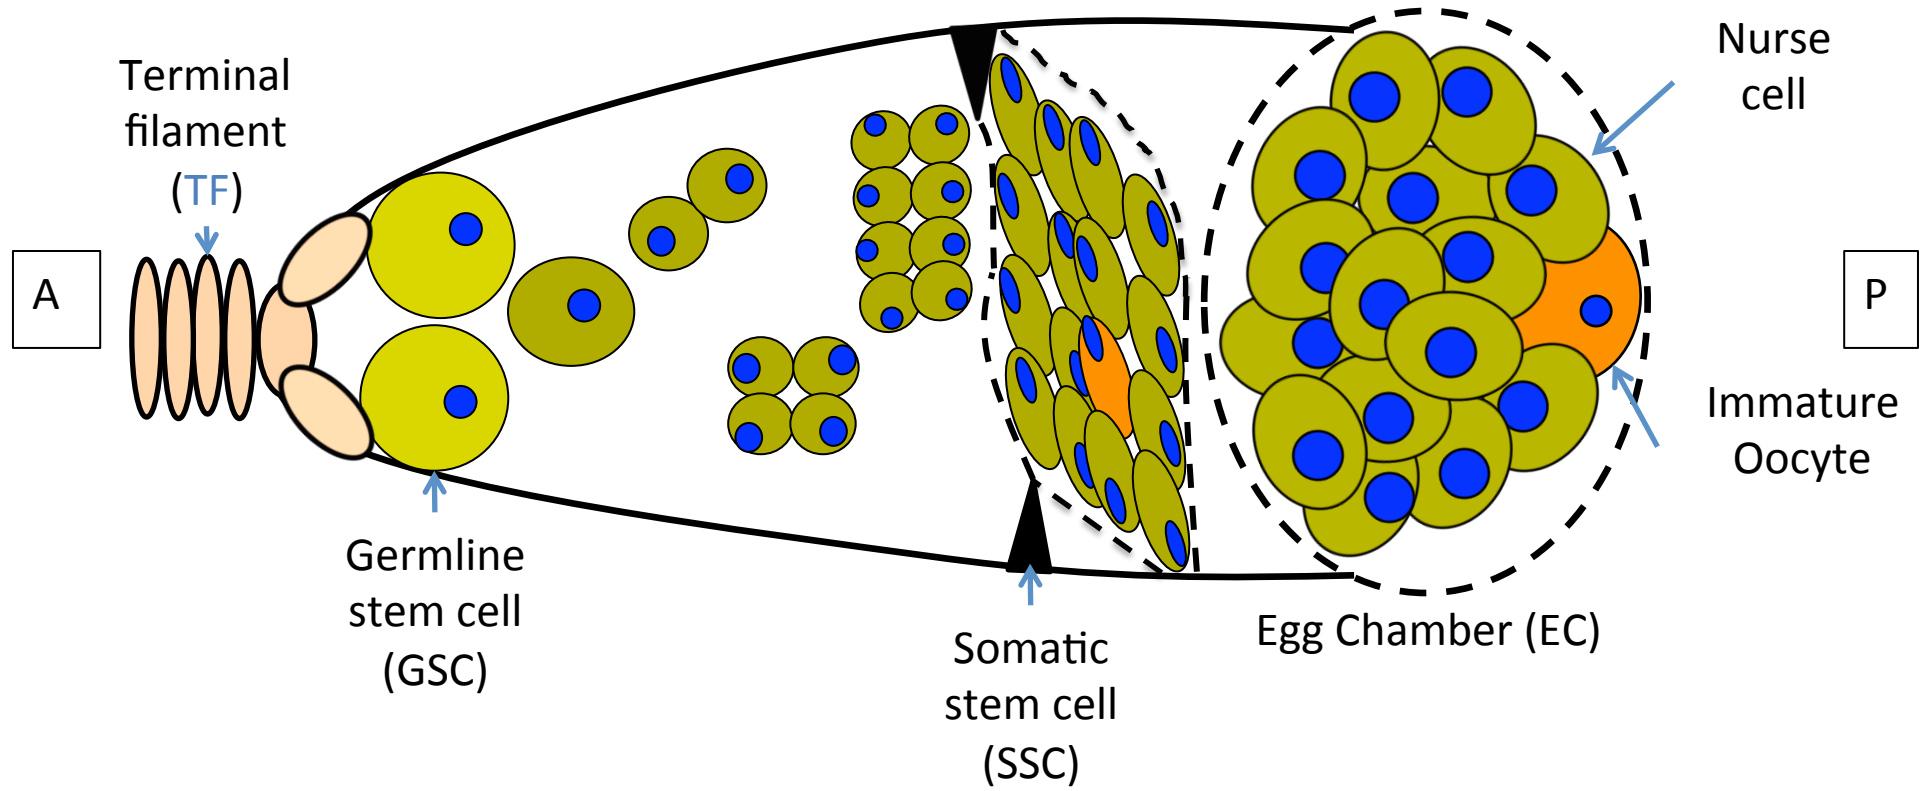

Figure S3

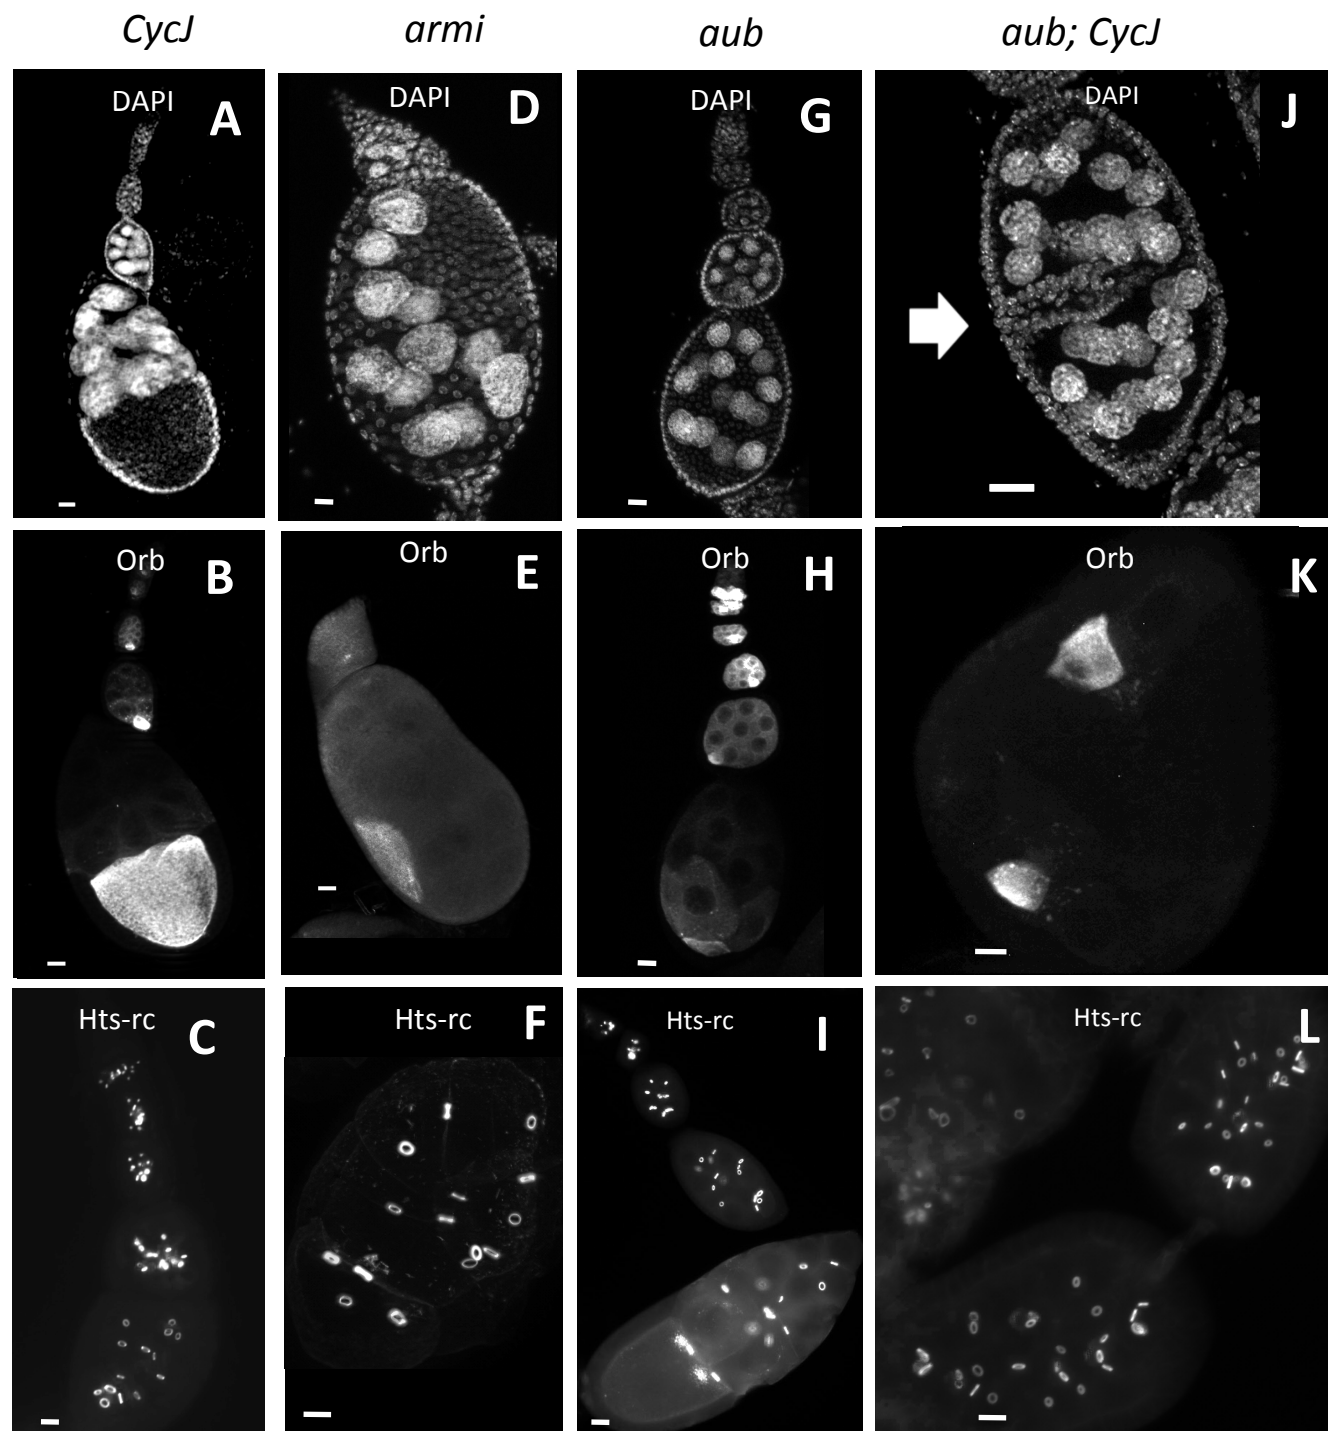

Figure S4: *CycJ* differentially regulates egg chamber formation, packaging, and maturation in the absence of the piRNA pathway

| Genotype                                                                                    | Alias                       | # of mature oocytes per fly |               | # of egg chambers per ovariole |               | % of compound egg chambers |               |           |                |           |
|---------------------------------------------------------------------------------------------|-----------------------------|-----------------------------|---------------|--------------------------------|---------------|----------------------------|---------------|-----------|----------------|-----------|
|                                                                                             |                             |                             |               |                                |               |                            |               |           |                |           |
| Wild Type                                                                                   | WT                          | 31.4<br>±0.8                | P=5.32<br>E-1 | 4.4±0.05                       | P=2.32<br>E-2 | 0.0%<br>±0.0%              | P=1.81<br>E-1 |           |                |           |
| <i>p{armi}, Df(3L)armi-J/Df(3L)Exel6095</i>                                                 | <i>CycJ</i>                 | 30.1<br>±1.8                |               | 4.3±0.05                       |               | 0.8%<br>±0.6%              |               |           |                |           |
| <i>VP16::nos-Gal4&gt;UAS-myc-CycJ; Df(3L)armi-J/Df(3L)Exel6095</i>                          | <b>Germline <i>armi</i></b> | 0.2<br>±0.1                 | P=8.05<br>E-2 | 1.5±0.07                       | P=1.23<br>E-3 | 19.4%<br>±1.9%             | P=1.41<br>E-4 |           |                |           |
| <i>VP16::nos-Gal4; Df(3L)armi-J/Df(3L)Exel6095</i>                                          | <b><i>armi, CycJ</i></b>    | 0.0<br>±0.0                 |               | 1.0±0.1                        |               | 37.7%<br>±3.8%             |               |           |                |           |
| <i>p{CycJ}; Df(3L)armi-J/Df(3L)Exel6095</i>                                                 | <i>armi</i>                 | 7.7<br>±0.5                 | P=8.86E-29    | 2.0±0.06                       | P=1.20E-13    | 9.9%<br>±1.0%              | P=1.22E-15    |           |                |           |
| <i>Df(3L)armi-J/Df(3L)Exel6095</i>                                                          | <i>armi, CycJ</i>           | 0.3<br>±0.1                 |               | P=9.00E-3                      |               | 1.2±0.07                   |               | P=3.82E-1 | 47.1%<br>±2.7% | P=7.54E-1 |
| <i>Df(3L)armi-J/Df(3L)Exel6095, 1 day old</i>                                               | <i>armi, CycJ</i>           | 0.0<br>±0.0                 |               |                                |               | 1.1±0.1                    |               |           | 48.0%<br>±5.7% |           |
| <i>aub[HN]/aub[QC42]</i>                                                                    | <i>aub</i>                  | 7.5<br>±1.8                 | P=8.20E-4     | 3.8±0.4                        | P=4.97E-1     | 2.1%<br>±1.8%              | P=8.01E-3     |           |                |           |
| <i>P{CycJ}; aub[HN]/aub[QC42]; p{armi}, Df(3L)armi-J/Df(3L)Exel6095</i>                     | <i>aub; CycJ</i> rescue     | 6.8<br>±0.9                 |               | P=2.11E-3                      |               | 3.7±0.4                    |               | P=4.23E-1 | 1.7%<br>±0.1%  | P=2.83E-3 |
| <i>aub[HN]/aub[QC42]; p{armi}, Df(3L)armi-J/Df(3L)Exel6095</i>                              | <i>aub; CycJ</i>            | 0.0<br>±0.0                 |               |                                |               | 3.8±0.2                    |               |           | 5.9%<br>±1.3%  |           |
| <i>piwi[06843]/Df(2L)BSC145, 0-2 day old</i>                                                | <i>piwi</i>                 | 0.0<br>±0.0                 | P=1.20E-1     | 1.2±0.1                        | P=6.90E-2     | 12.5%<br>±2.0%             | P=1.72E-5     |           |                |           |
| <i>P{CycJ}; piwi[06843]/Df(2L)BSC145; p{armi}, Df(3L)armi-J/Df(3L)Exel6095, 0-2 day old</i> | <i>piwi; CycJ</i> rescue    | 0.0<br>±0.0                 |               | P=1.20E-1                      |               | 2.5±0.07                   |               | P=1.14E-4 | 10.1%<br>±0.4% | P=1.21E-5 |
| <i>piwi[06843]/Df(2L)BSC145; p{armi}, Df(3L)armi-J/Df(3L)Exel6095</i>                       | <i>piwi; CycJ</i>           | 0.4<br>±0.3                 |               |                                |               | 1.5±0.2                    |               |           | 47%<br>±5.6%   |           |



Figure S5

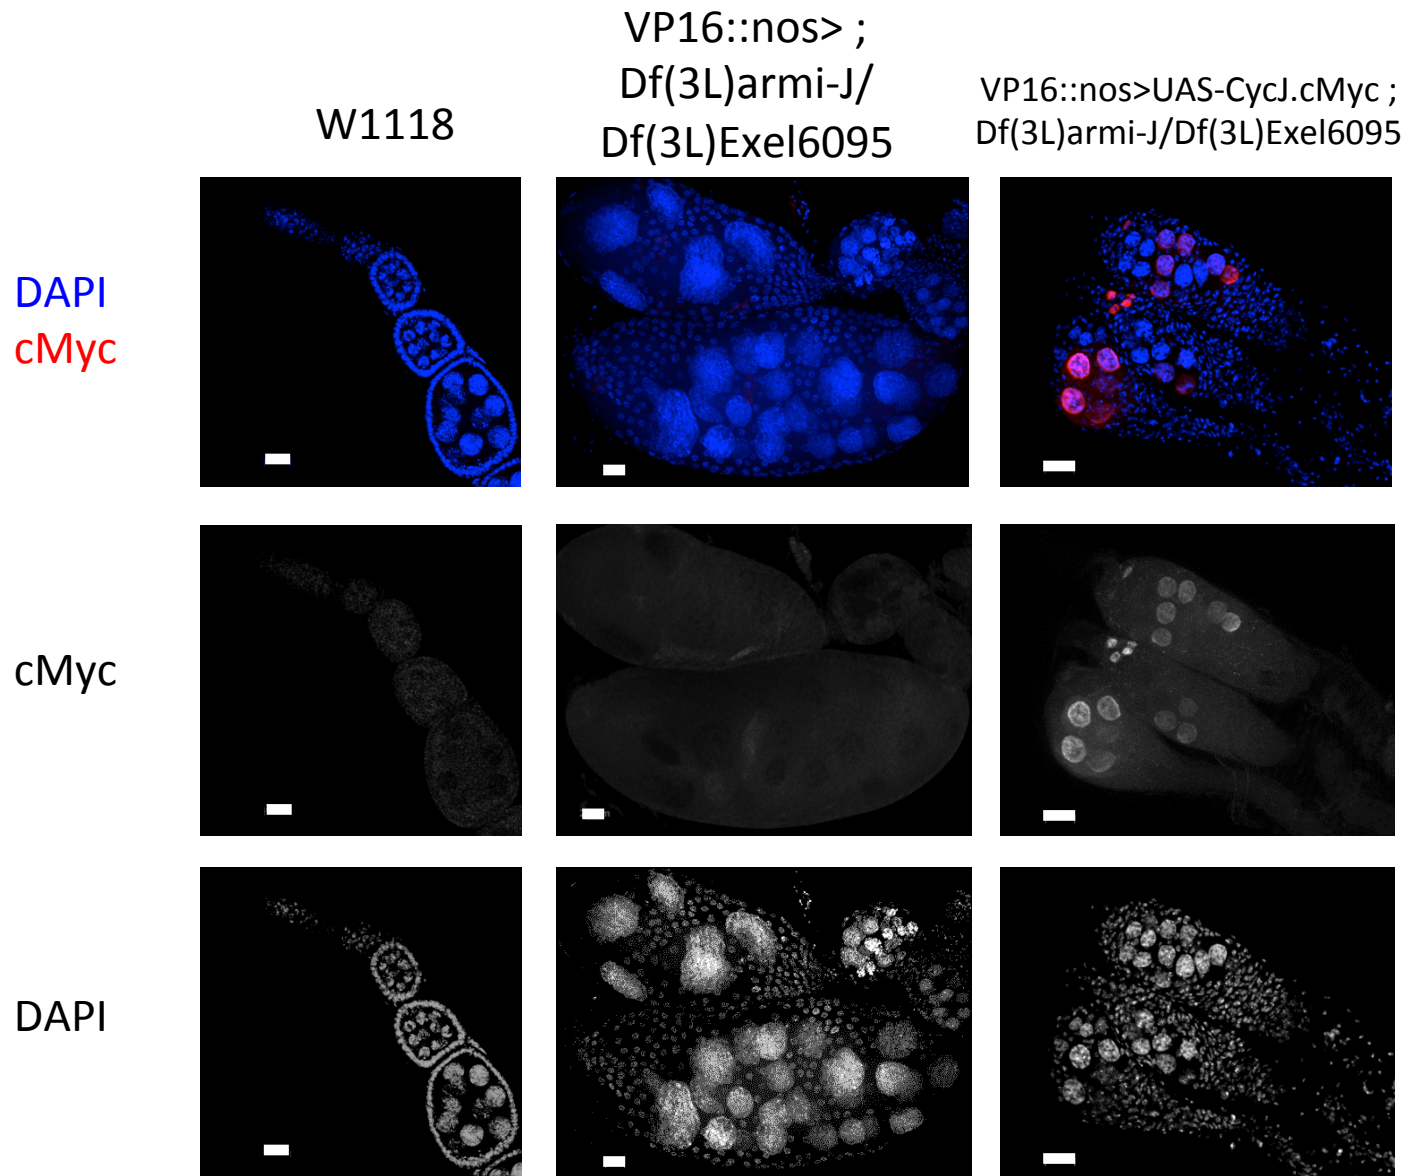

Figure S6

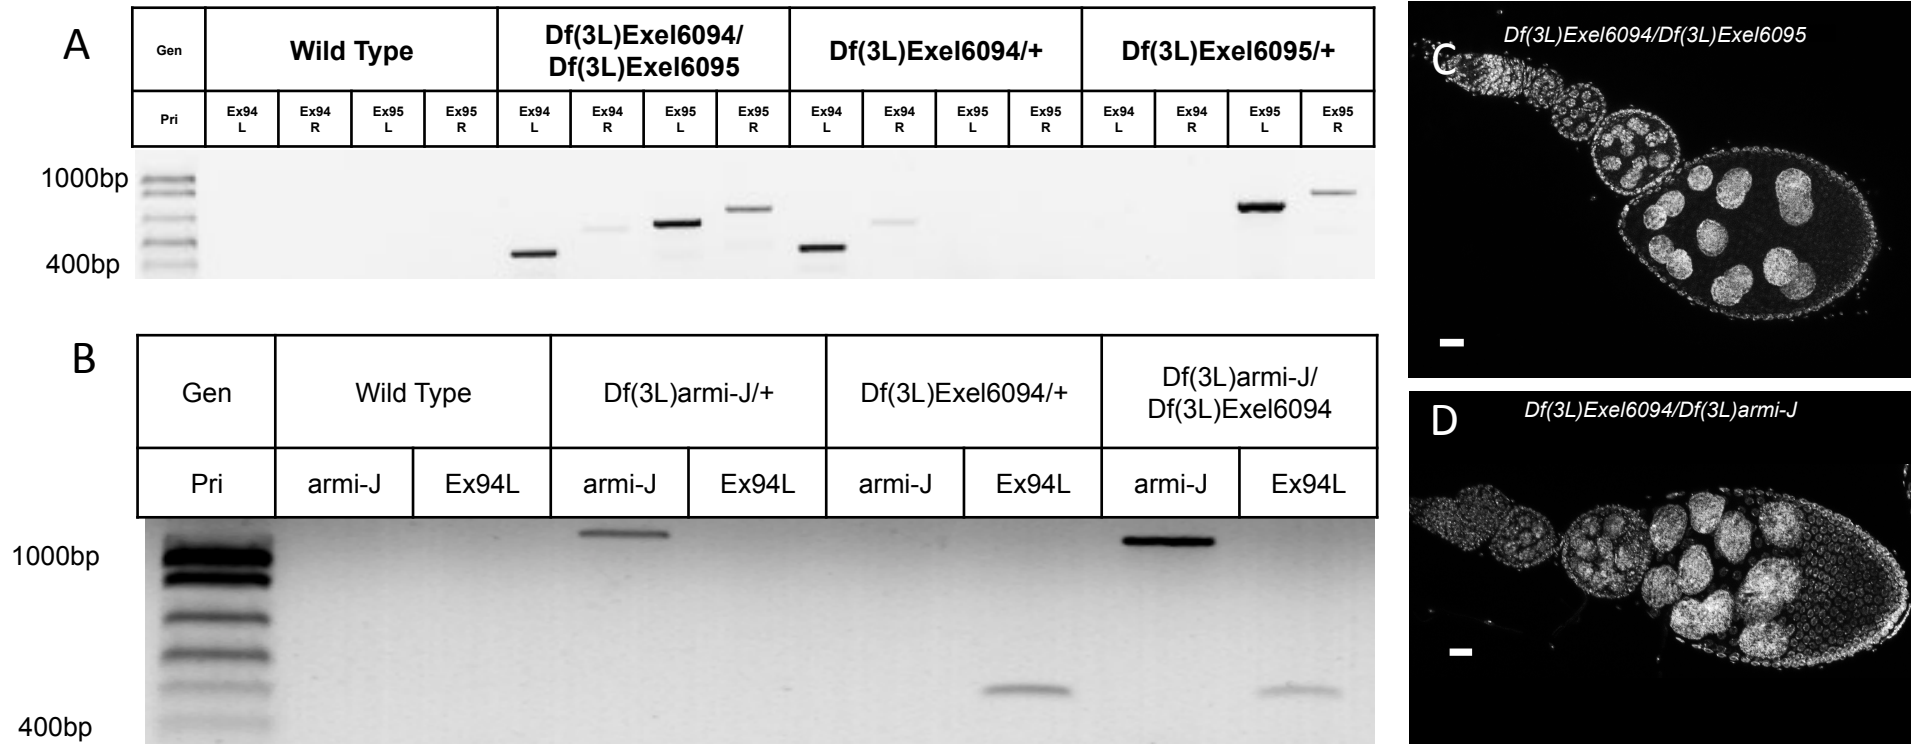

Supplement: NIHMS606081-supplement-01.pdf [file NIHMS606081-supplement-01.pdf]
